# Supplementary material for: Hair Growth Promotion Activity and Its Mechanism of Polygonum multiflorum
Source: PubMed Central journal article supplement (PMC4534627; doi:10.1155/2015/517901), 2015-07-30
Supplement: 517901.f1.pdf [file 517901.f1.pdf]

Table S1. HGF and  $\beta$ -catenin concentration changes from 3<sup>rd</sup> to 6<sup>th</sup> week (ng/l)

| Groups | 3 <sup>rd</sup> week |                  | 4 <sup>th</sup> week |                  | 6 <sup>th</sup> week |                  |
|--------|----------------------|------------------|----------------------|------------------|----------------------|------------------|
|        | HGF                  | $\beta$ -catenin | HGF                  | $\beta$ -catenin | HGF                  | $\beta$ -catenin |
| A      | 4188.40              | 202.40           | 3252.00              | 209.70           | 2419.60              | 188.55           |
| B      | 4506.75              | 190.75           | 3712.25              | 208.55           | 3535.05              | 186.05           |
| C      | 4388.25              | 211.35           | 3577.45              | 230.80           | 2875.90              | 200.45           |
| D      | 4774.45              | 181.15           | 4252.70              | 198.20           | 3372.15              | 165.80           |
| E      | 4522.25              | 174.65           | 3683.15              | 169.00           | 3755.55              | 154.70           |
| F      | 4412.70              | 100.90           | 3238.81              | 175.75           | 2332.00              | 146.60           |
| G      | 4294.95              | 170.35           | 2705.10              | 175.45           | 2059.85              | 144.50           |
| H      | 4216.40              | 165.80           | 3241.45              | 196.80           | 2006.20              | 140.15           |
| I      | 4475.05              | 179.25           | 3118.45              | 164.95           | 2240.30              | 161.80           |
| J      | 4118.60              | 198.20           | 4085.45              | 197.10           | 2699.35              | 143.25           |
| K      | 3433.80              | 196.25           | 4142.75              | 161.30           | 2163.05              | 157.60           |

Table S2 FGF-7 and IGF-1 concentration changes from 3<sup>rd</sup> to 6<sup>th</sup> week (ng/l)

| Groups | 3 <sup>rd</sup> week |          | 4 <sup>th</sup> week |          | 6 <sup>th</sup> week |          |
|--------|----------------------|----------|----------------------|----------|----------------------|----------|
|        | FGF-7                | IGF-1    | FGF-7                | IGF-1    | FGF-7                | IGF-1    |
| A      | 2499.437             | 18626.97 | 2354.498             | 18747.84 | 2227.239             | 19634.11 |
| B      | 2163.705             | 17233.48 | 2810.462             | 19473.22 | 2043.047             | 19458.06 |
| C      | 1904.931             | 20665.12 | 2078.877             | 18977.08 | 1808.215             | 21353.46 |
| D      | 2552.872             | 18611.15 | 1700.589             | 20088.97 | 1752.616             | 19090.72 |
| E      | 2604.875             | 18243.99 | 1733.606             | 17886.78 | 1629.188             | 19208.82 |
| F      | 2616.66              | 19563.89 | 1751.349             | 20010.69 | 1720.917             | 19946.83 |
| G      | 2554.057             | 18857.58 | 1780.446             | 19848.13 | 1731.069             | 21024.58 |
| H      | 2576.54              | 18992.61 | 2078.877             | 21056.86 | 1601.03              | 18945.97 |
| I      | 2152.674             | 21199.03 | 1715.838             | 22157.90 | 1191.217             | 20360.26 |
| J      | 2056.65              | 17870.40 | 2210.167             | 19341.48 | 1618.956             | 20432.21 |
| K      | 2379.784             | 17766.40 | 2130.582             | 19639.11 | 1377.496             | 20079.21 |

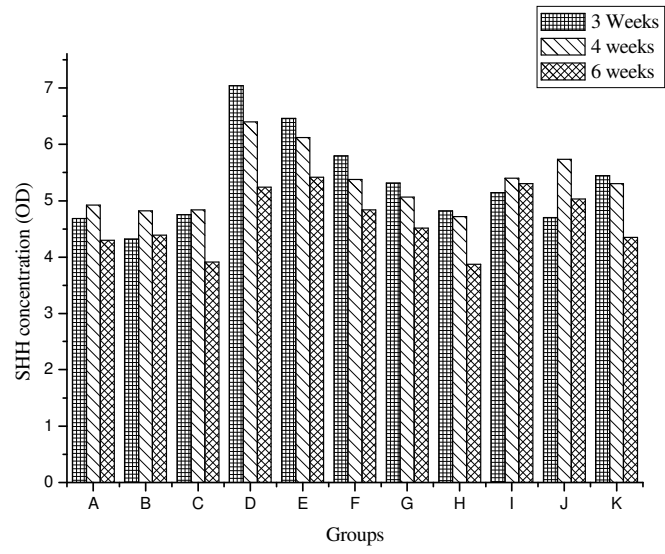

Figure S1. SHH concentration changes from 3<sup>rd</sup> to 6<sup>th</sup> week.
